# Supplementary material for: A novel route for synthesis of UV-resistant hydrophobic titania-containing silica aerogels by using potassium titanate as precursor
Source: Royal Society of Chemistry journal article supplement (doi:10.1039/c3dt53389a), 2014-01-01
Supplement: c3dt53389a1.pdf [file c3dt53389a1.pdf]

# A novel route for synthesis of UV-resistant hydrophobic titania-containing silica aerogels by using potassium titanate as precursor

Wei Wei, Xiaomeng Lü, Deli Jiang, Zaoxue Yan, Min Chen, Jimin Xie\*

School of Chemistry and Chemical Engineering, Jiangsu University, Zhenjiang, 212013, P. R. China

\*Corresponding author: Jimin Xie

Tel.: +86 11 88791708; fax: +86 11 88791800;

E-mail address: xiejm391@sohu.com

## Supporting Information

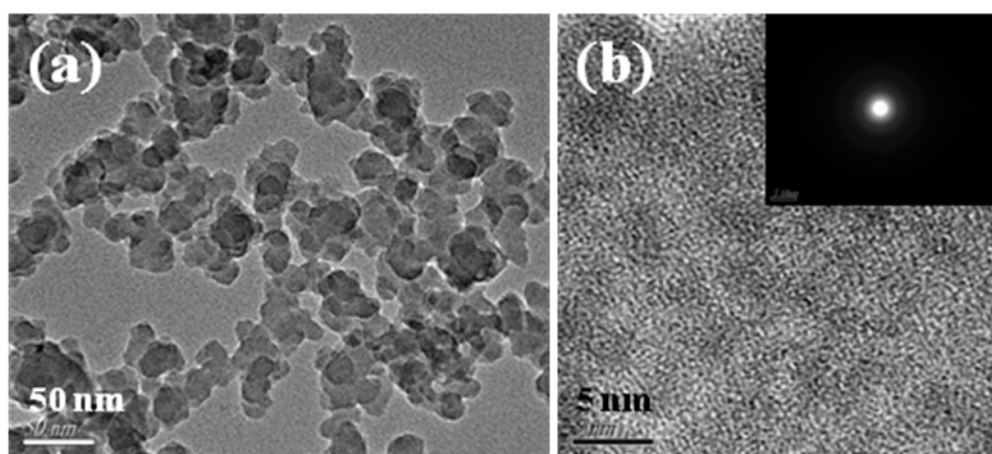

**Figure S1.** (a) TEM image depicting TSA-3, (b) HRTEM image and the corresponding SAED pattern (insert) of the spherical solid in TSA-3.

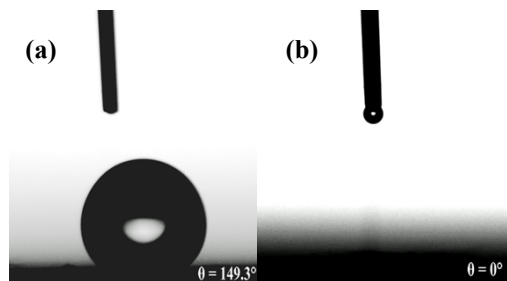

**Figure S2.** Pictures of water contact angle on samples: (a) TSA-3 and (b) TSA3-600.

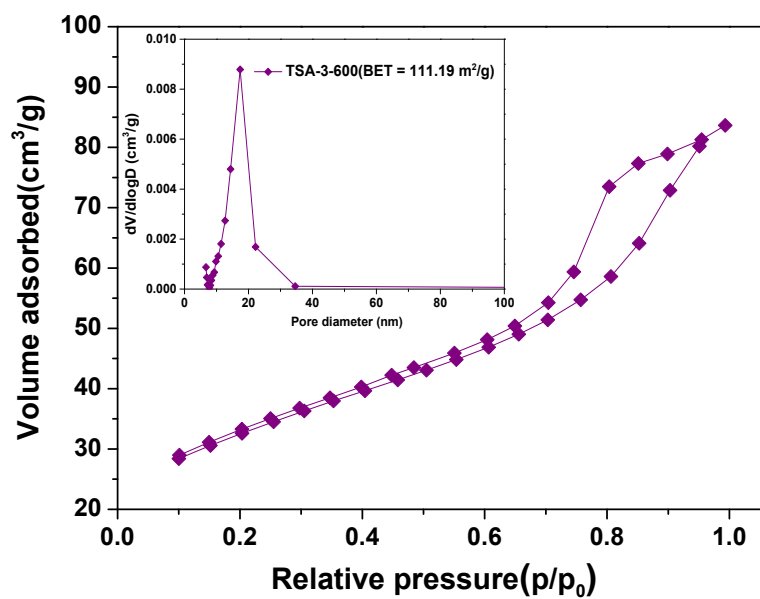

**Figure S3.**  $N_2$  adsorption-desorption isotherms of TSA3-600 (Inset: Pore size distribution of the sample)

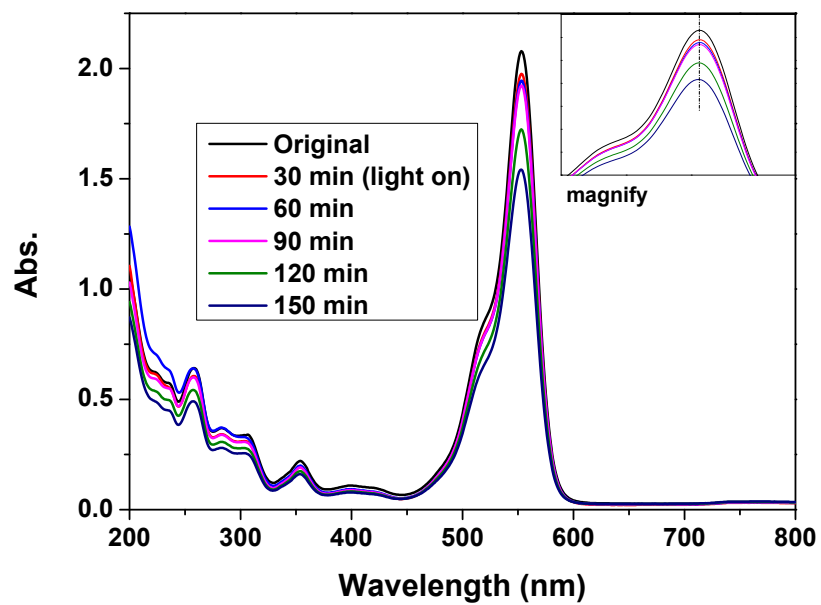

**Figure S4.** UV-Vis spectral changes of RhB dye (silica aerogels: 100 mg; RhB: 10mg·L<sup>-1</sup>).
